# Supplementary material for: Coriander Oil Reverses Dexamethasone-Induced Insulin Resistance in Rats
Source: MDPI journal article supplement (doi:10.3390/antiox11030441), 2022-02-23
Supplement: s1 [file s1]

## Coriander oil reverses dexamethasone-induced insulin resistance in rats

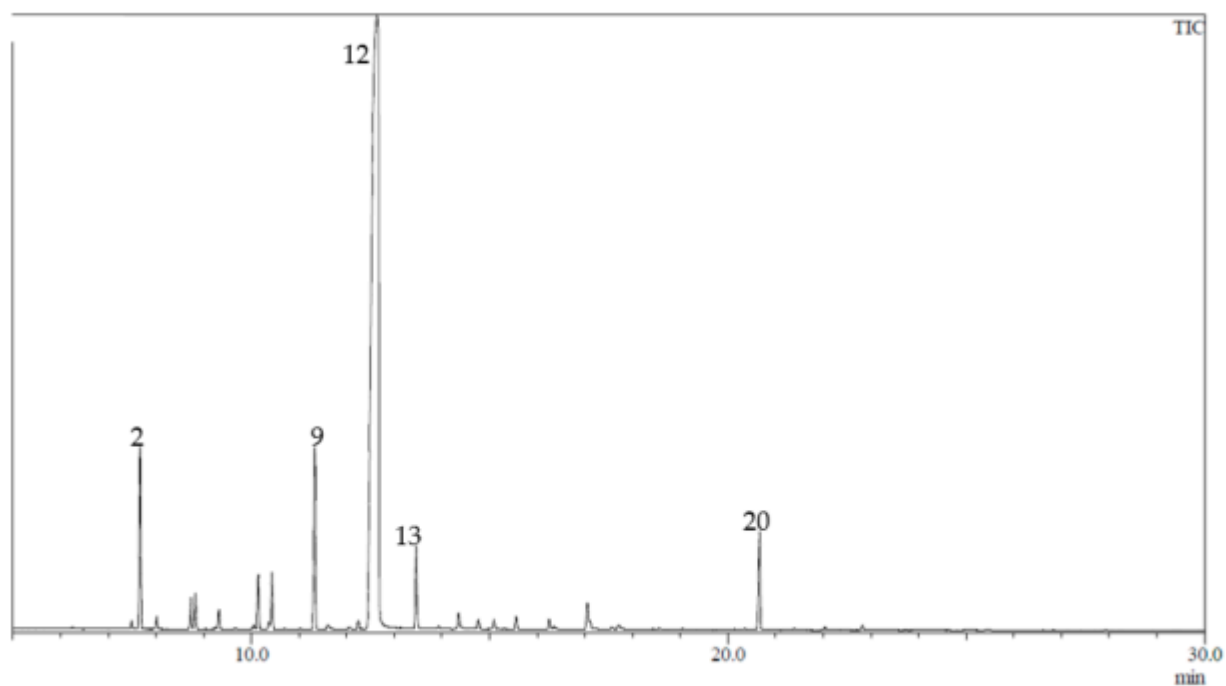

**Figure S1.** GC-MS profile of *C. sativum* fruits oil.

**Table S1.** Essential oil composition of *C. sativum* fruits using GC-MS analysis.

| No.                            | Compounds            | Calculated retention index | Relative abundance (%) |
|--------------------------------|----------------------|----------------------------|------------------------|
| 1                              | Thujene              | 921                        | 0.21                   |
| 2                              | $\alpha$ -Pinene     | 928                        | 4.65                   |
| 3                              | Camphene             | 941                        | 0.31                   |
| 4                              | Sabinene             | 967                        | 0.84                   |
| 5                              | $\beta$ -Pinene      | 970                        | 0.97                   |
| 6                              | Myrcene              | 988                        | 0.47                   |
| 7                              | <i>p</i> -Cymene     | 1016                       | 1.49                   |
| 8                              | Sylvestrene          | 1025                       | 1.67                   |
| 9                              | $\gamma$ - Terpinene | 1054                       | 5.15                   |
| 10                             | cis linalool oxide   | 1063                       | 0.2                    |
| 11                             | Terpinolene          | 1084                       | 0.25                   |
| 12                             | Linalool             | 1096                       | 75.14                  |
| 13                             | Camphor              | 1123                       | 2.4                    |
| 14                             | Isoborneol           | 1151                       | 0.59                   |
| 15                             | Terpinen-4-ol        | 1164                       | 0.29                   |
| 16                             | $\alpha$ -Terpineol  | 1175                       | 0.29                   |
| 17                             | Decanal              | 1190                       | 0.35                   |
| 18                             | Cumin aldehyde       | 1213                       | 0.27                   |
| 19                             | Geraniol             | 1241                       | 1.08                   |
| 20                             | Geranyl acetate      | 1368                       | 2.91                   |
| 21                             | Caryophyllene E      | 1418                       | 0.1                    |
| Total identified               |                      |                            | 99.63                  |
| Monoterpene hydrocarbons       |                      |                            | 16.01                  |
| Oxygen containing monoterpenes |                      |                            | 82.9                   |
| Others                         |                      |                            | 0.72                   |
